# Supplementary material for: Collection and identification of an unknown component from Eugenia uniflora essential oil exploiting a multidimensional preparative three-GC system employing apolar, mid-polar and ionic liquid stationary phases
Source: Royal Society of Chemistry journal article supplement (doi:10.1039/c8fd00234g), 2019-01-01

## Electronic Supplementary Material

Electron impact GC-MS spectrum of the isolated component

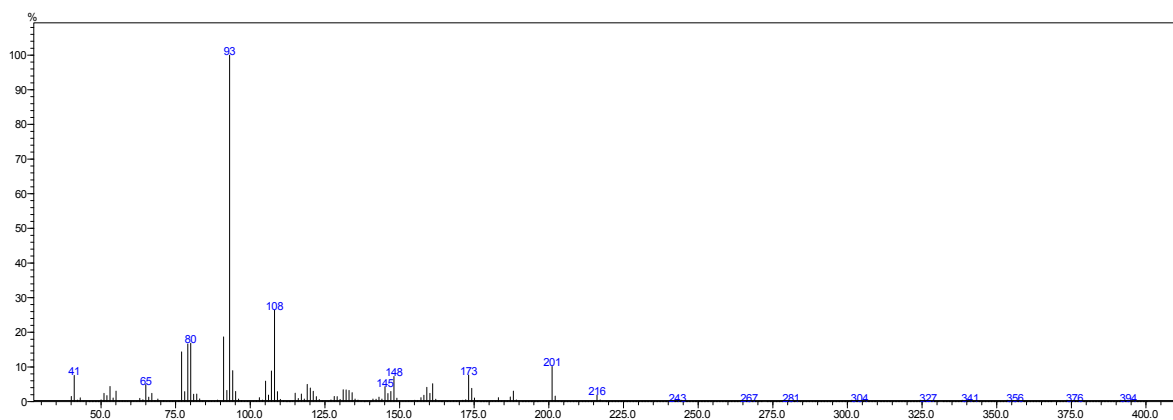

Condensed phase GC-FTIR spectrum of the isolated component

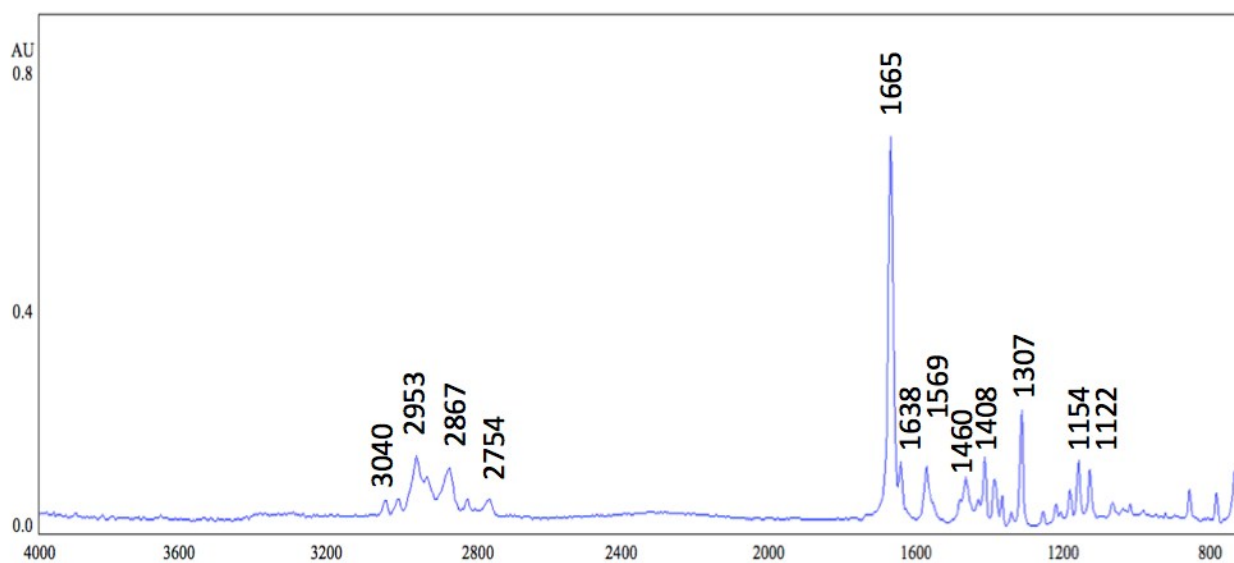

## Comprehensive NMR tables and structure with assignment

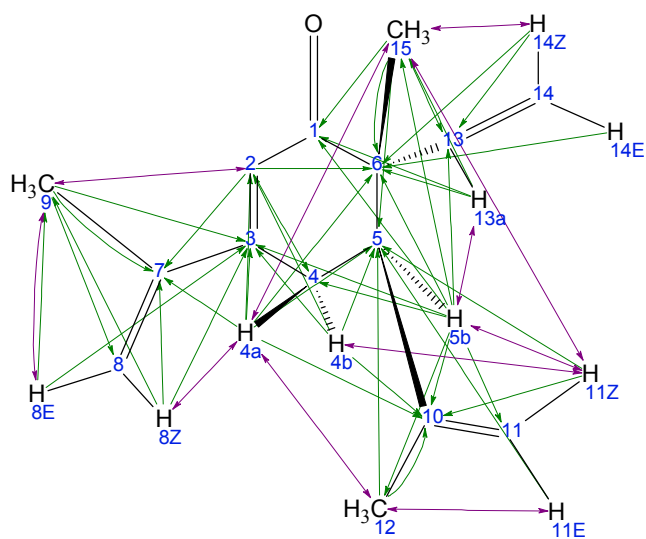

| #  | Atom# | C Label | C Shift | XHn | H Label | H Shift | C Calc Shift | H Calc Shift | H Multiplicity      | NOESY        | H HMBC                       | C HMBC                         |
|----|-------|---------|---------|-----|---------|---------|--------------|--------------|---------------------|--------------|------------------------------|--------------------------------|
| 1  | 15    | C 15    | 19.339  | CH3 | H 15    | 1.109   | 19.723       | 1.190        | s                   | 4a, 11Z, 14Z | 5b, 13a                      | 6, 5, 13, 1                    |
| 2  | 9     | C 9     | 20.515  | CH3 | H 9     | 1.981   | 21.862       | 1.951        | s                   | 8E, 2        | 8E, 8Z                       | 8, 7, 3                        |
| 3  | 12    | C 12    | 23.220  | CH3 | H 12    | 1.601   | 22.354       | 1.707        | d (0.64)            | 4a, 11E      | 5b                           | 5, 10                          |
| 4  | 4a    | C 4     | 29.988  | CH2 | H 4a    | 2.622   | 32.643       | 2.768        | br dd (17.90, 3.84) | 15, 12, 8Z   | 5b, 2                        | 6, 5, 2, 7, 10, 3              |
| 5  | 4b    | C 4     | 29.988  | CH2 | H 4b    | 2.828   | 32.643       | 2.794        | m                   | 11Z          | 5b, 2                        | 5, 2, 10, 3                    |
| 6  | 6     | C 6     | 51.256  | C   |         |         | 51.794       |              |                     |              | 15, 4a, 5b, 14Z, 14E, 13a, 2 |                                |
| 7  | 5b    | C 5     | 52.125  | CH  | H 5b    | 2.867   | 51.084       | 2.801        | s                   | 11Z, 13a     | 15, 12, 4a, 4b, 11Z, 11E     | 15, 12, 4, 6, 11, 13, 10, 3, 1 |
| 8  | 14E   | C 14    | 114.570 | CH2 | H 14E   | 5.055   | 114.943      | 5.194        | dd (10.66, 0.85)    |              |                              | 6                              |
| 9  | 14Z   | C 14    | 114.570 | CH2 | H 14Z   | 4.947   | 114.943      | 5.162        | br dd (17.69, 0.85) | 15           |                              | 6, 13                          |
| 10 | 11E   | C 11    | 114.634 | CH2 | H 11E   | 4.810   | 113.276      | 4.859        | br d (1.49)         | 12           | 5b                           | 5                              |
| 11 | 11Z   | C 11    | 114.634 | CH2 | H 11Z   | 4.794   | 113.276      | 4.837        | d (0.64)            | 15, 4b, 5b   | 5b                           | 5, 10                          |
| 12 | 8Z    | C 8     | 119.262 | CH2 | H 8Z    | 5.545   | 122.301      | 5.341        | s                   | 4a, 8E       | 9                            | 9, 7, 3                        |
| 13 | 8E    | C 8     | 119.262 | CH2 | H 8E    | 5.346   | 122.301      | 5.234        | s                   | 9, 8Z        | 9                            | 9, 3                           |
| 14 | 2     | C 2     | 124.794 | CH  | H 2     | 6.037   | 119.329      | 5.978        | s                   | 9            | 4a, 4b                       | 4, 6, 7                        |
| 15 | 7     | C 7     | 143.174 | C   |         |         | 142.886      |              |                     |              | 9, 4a, 8Z, 2                 |                                |
| 16 | 13a   | C 13    | 143.303 | CH  | H 13    | 5.938   | 140.341      | 5.961        | dd (17.48, 10.66)   | 5b           | 15, 5b, 14Z                  | 15, 6, 1                       |
| 17 | 10    | C 10    | 147.067 | C   |         |         | 144.817      |              |                     |              | 12, 4a, 4b, 5b, 11Z          |                                |
| 18 | 3     | C 3     | 155.417 | C   |         |         | 155.658      |              |                     |              | 9, 4a, 4b, 5b, 8E, 8Z        |                                |
| 19 | 1     | C 1     | 201.780 | C   |         |         | 202.192      |              |                     |              | 15, 5b, 13a                  |                                |

### 1H-NMR data

<sup>1</sup>H NMR (500 MHz, Solvent)  $\delta$  ppm 1.11 (s, 3 H) 1.60 (d,  $J=0.64$  Hz, 3 H) 1.98 (s, 3 H) 2.62 (br dd,  $J=17.90, 3.84$  Hz, 2 H) 2.79 - 2.84 (m, 4 H) 2.85 (s, 32 H) 4.79 (d,  $J=0.64$  Hz, 1 H) 4.81 (br d,  $J=1.49$  Hz, 1 H) 4.96 (br dd,  $J=17.69, 0.85$  Hz, 2 H) 5.05 (dd,  $J=10.66, 0.85$  Hz, 2 H) 5.35 (s, 1 H) 5.55 (s, 1 H) 5.94 (dd,  $J=17.48, 10.66$  Hz, 2 H) 6.04 (s, 1 H)

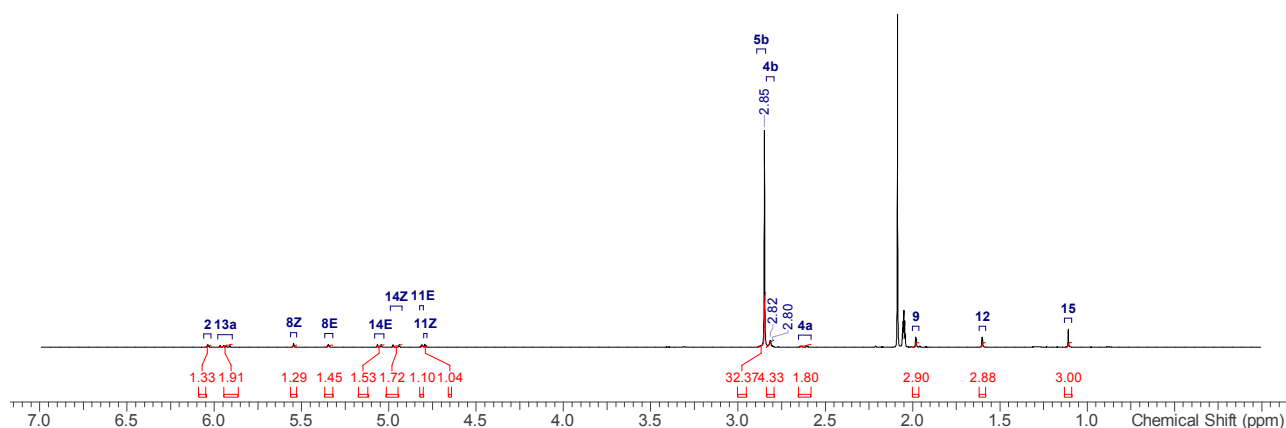

# <sup>13</sup>C NMR spectrum

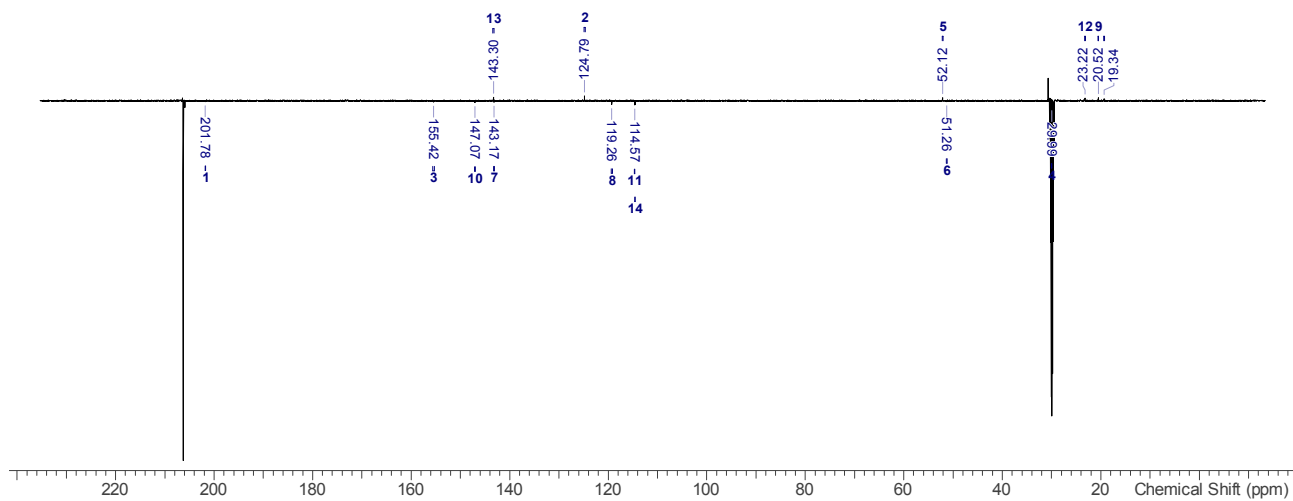

# 13C-1H HSQC Spectrum

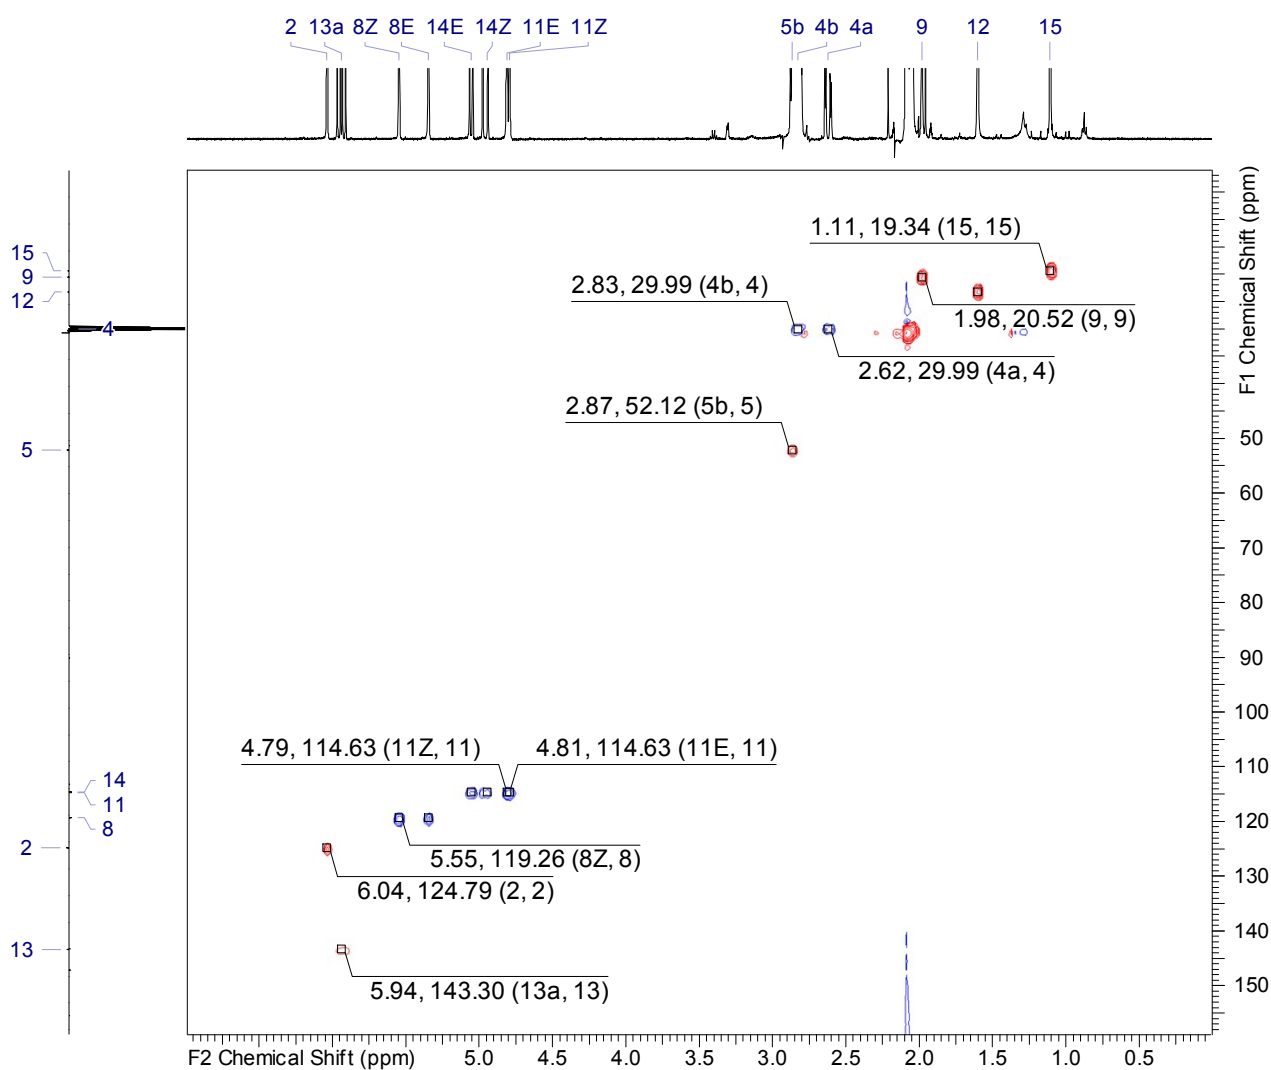

## Assignment of the HSQC spots

| No. | F2 Atom | F1 Atom | F2 (ppm) | F1 (ppm) |
|-----|---------|---------|----------|----------|
| 1   | 2       | 2       | 6.04     | 124.79   |
| 2   | 4a      | 4       | 2.62     | 29.99    |
| 3   | 4b      | 4       | 2.83     | 29.99    |
| 4   | 5b      | 5       | 2.87     | 52.12    |
| 5   | 8E      | 8       | 5.35     | 119.26   |
| 6   | 8Z      | 8       | 5.55     | 119.26   |
| 7   | 9       | 9       | 1.98     | 20.52    |
| 8   | 11E     | 11      | 4.81     | 114.63   |
| 9   | 11Z     | 11      | 4.79     | 114.63   |
| 10  | 12      | 12      | 1.60     | 23.30    |
| 11  | 13a     | 13      | 5.94     | 143.30   |
| 12  | 14E     | 14      | 5.05     | 114.57   |
| 13  | 14Z     | 14      | 4.95     | 114.57   |
| 14  | 15      | 15      | 1.11     | 19.34    |

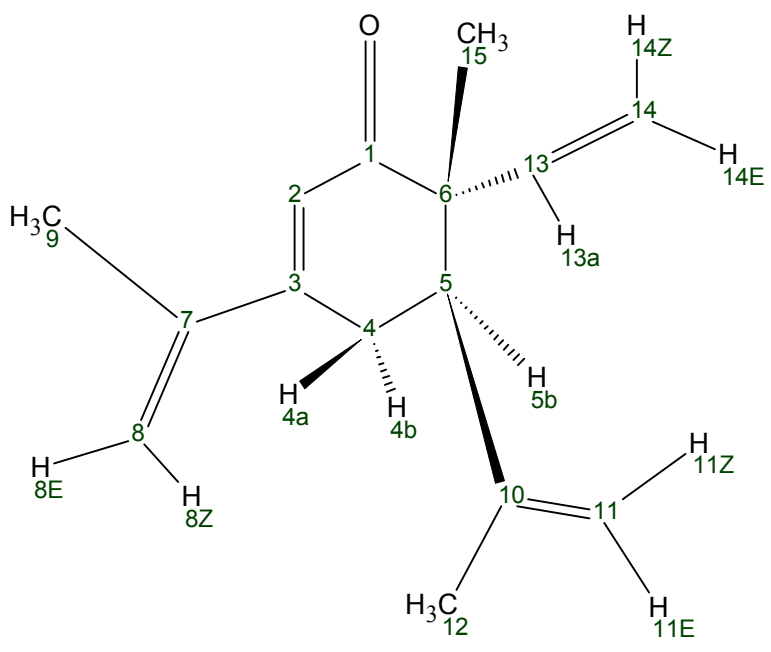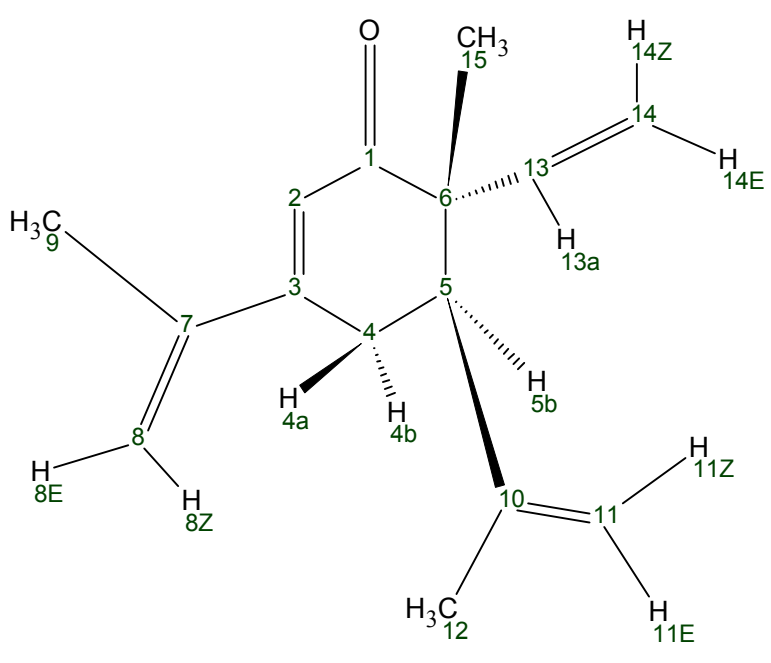

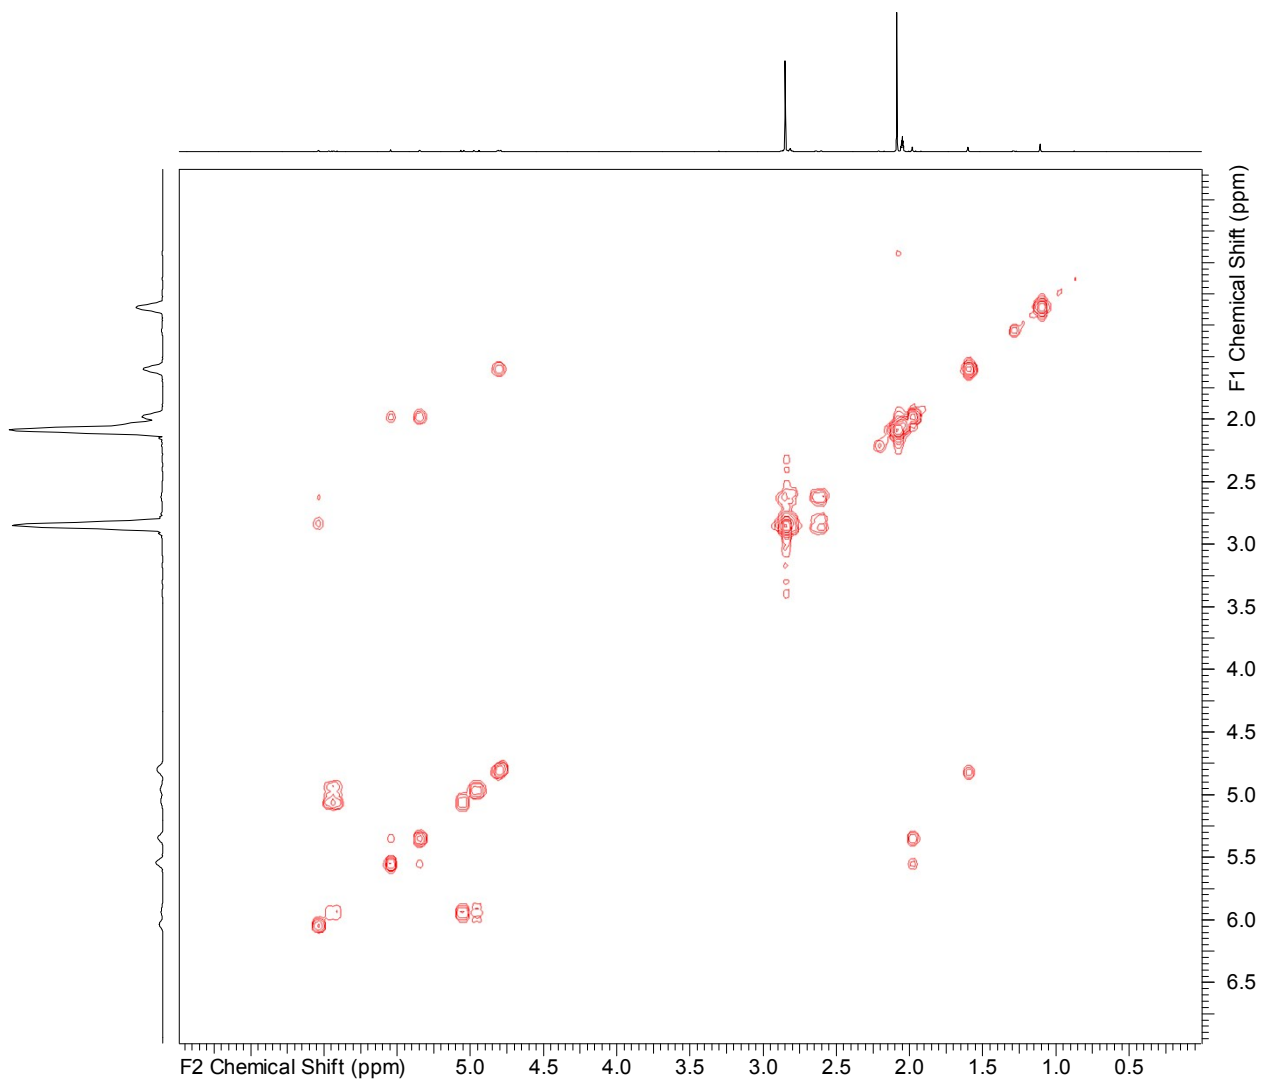

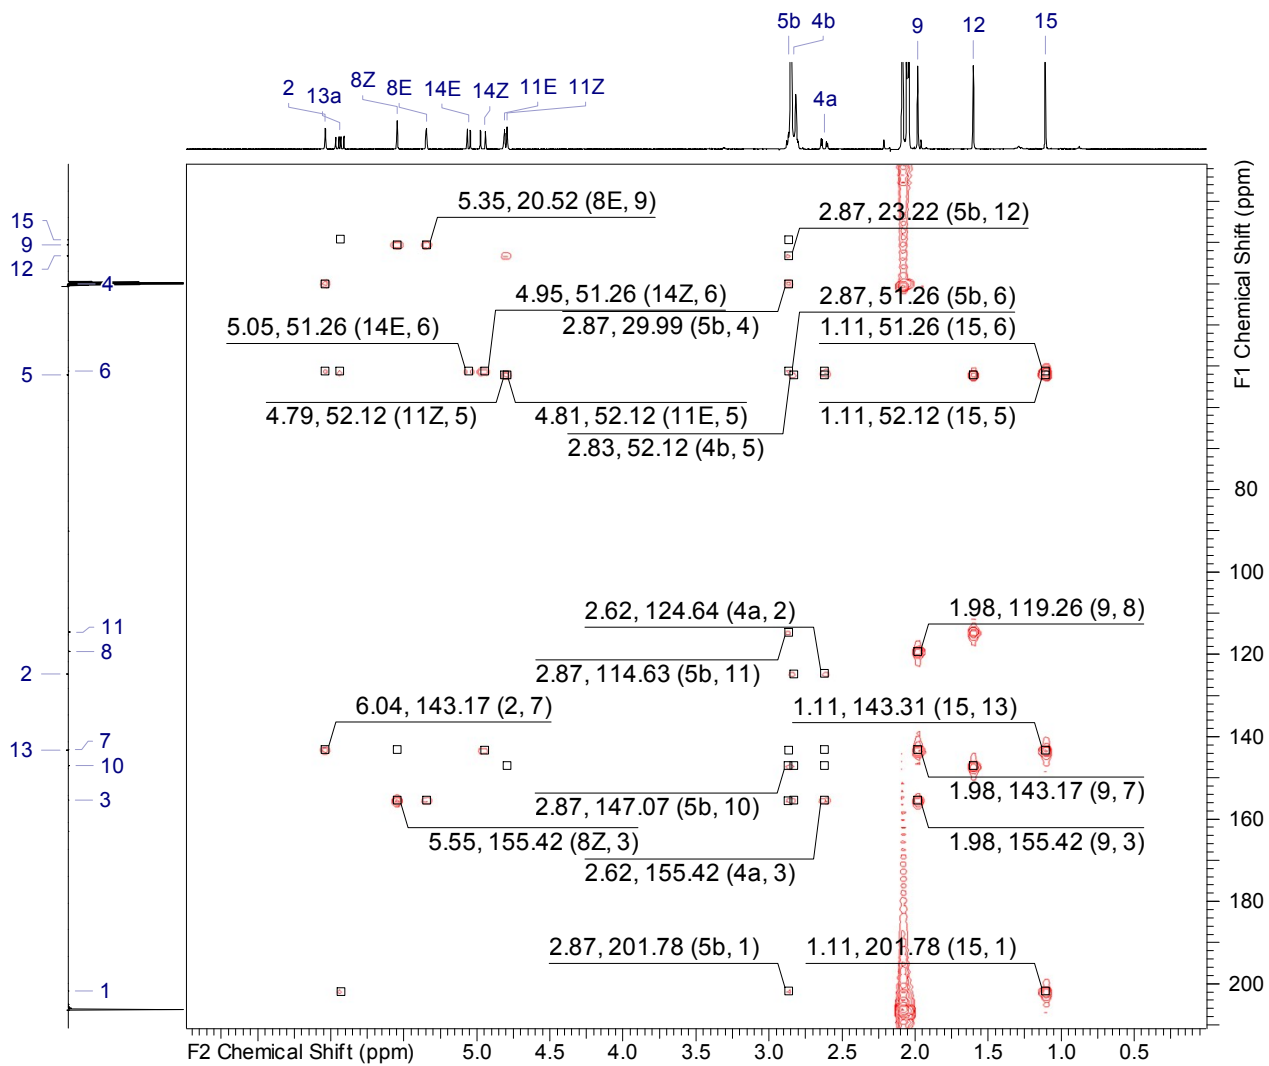

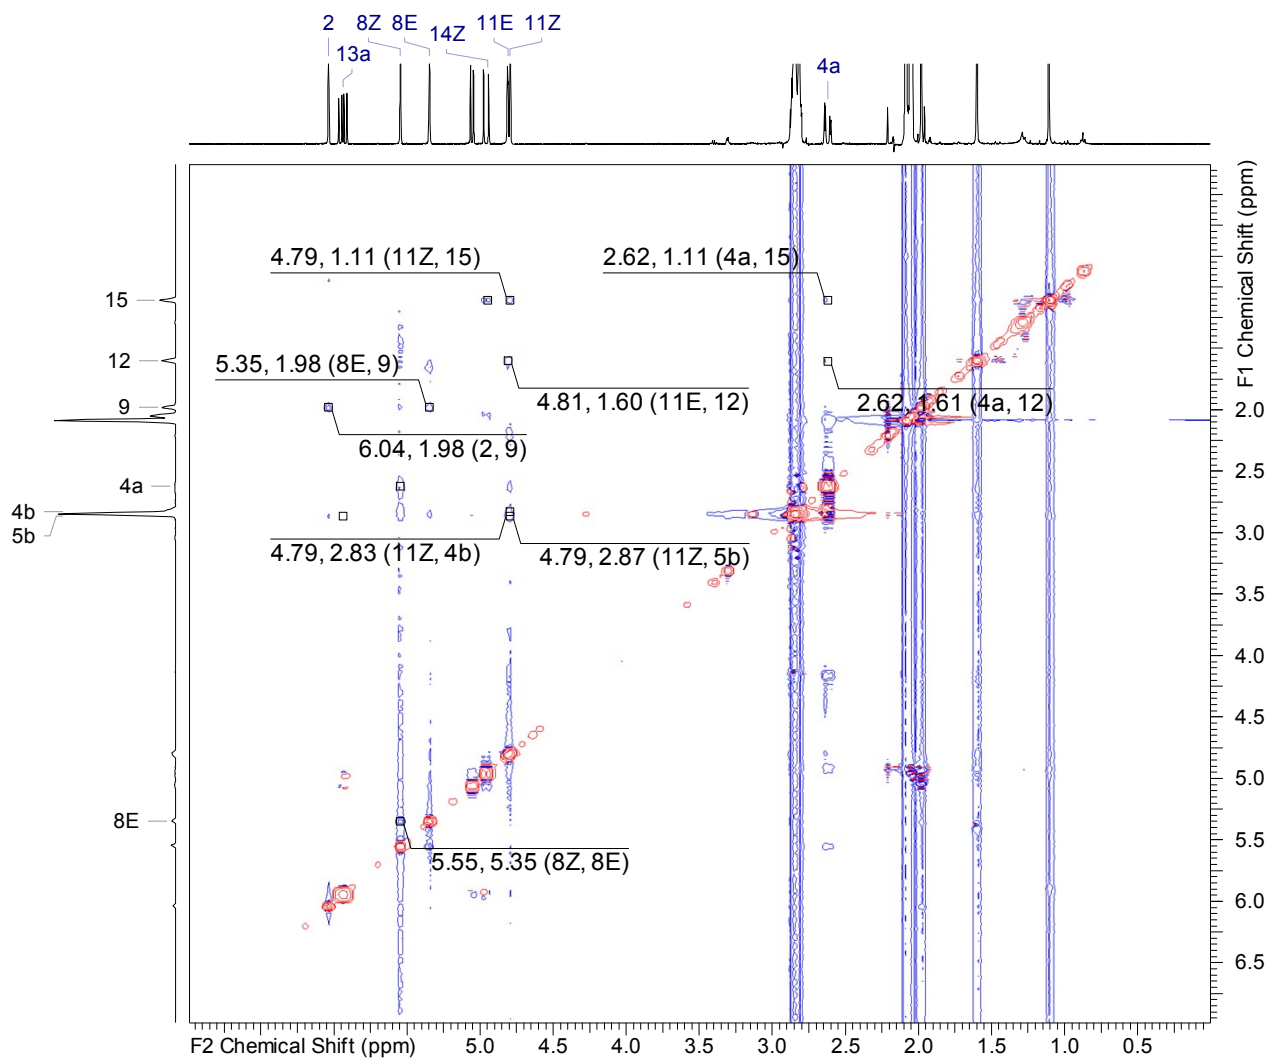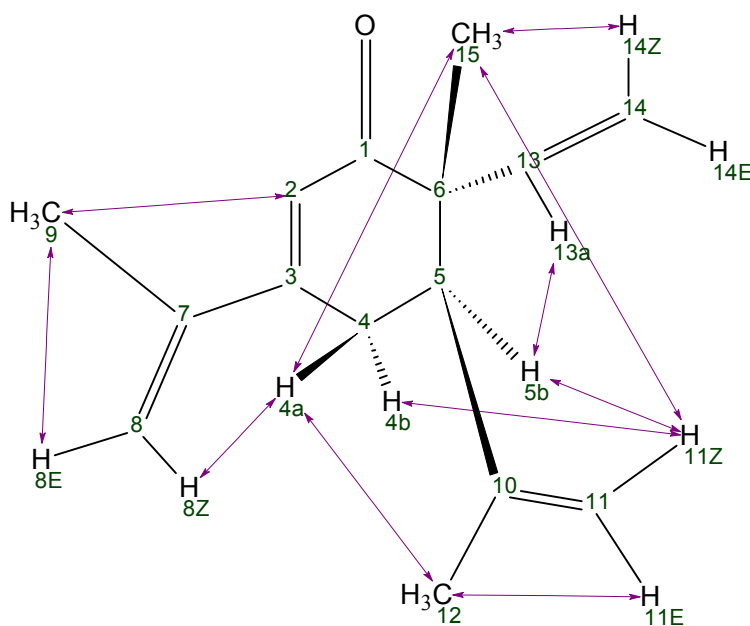

| No. | F2 Atom | F1 Atom | F2 (ppm) | F1 (ppm) |
|-----|---------|---------|----------|----------|
| 1   | 8Z      | 4a      | 5.55     | 2.62     |
| 2   | 11Z     | 4b      | 4.79     | 2.83     |
| 3   | 11Z     | 5b      | 4.79     | 2.87     |
| 4   | 13a     | 5b      | 5.94     | 2.87     |
| 5   | 8Z      | 8E      | 5.55     | 5.35     |
| 6   | 2       | 9       | 6.04     | 1.98     |
| 7   | 8E      | 9       | 5.35     | 1.98     |
| 8   | 4a      | 12      | 2.62     | 1.61     |
| 9   | 11E     | 12      | 4.81     | 1.60     |
| 10  | 4a      | 15      | 2.62     | 1.11     |
| 11  | 11Z     | 15      | 4.79     | 1.11     |
| 12  | 14Z     | 15      | 4.95     | 1.11     |



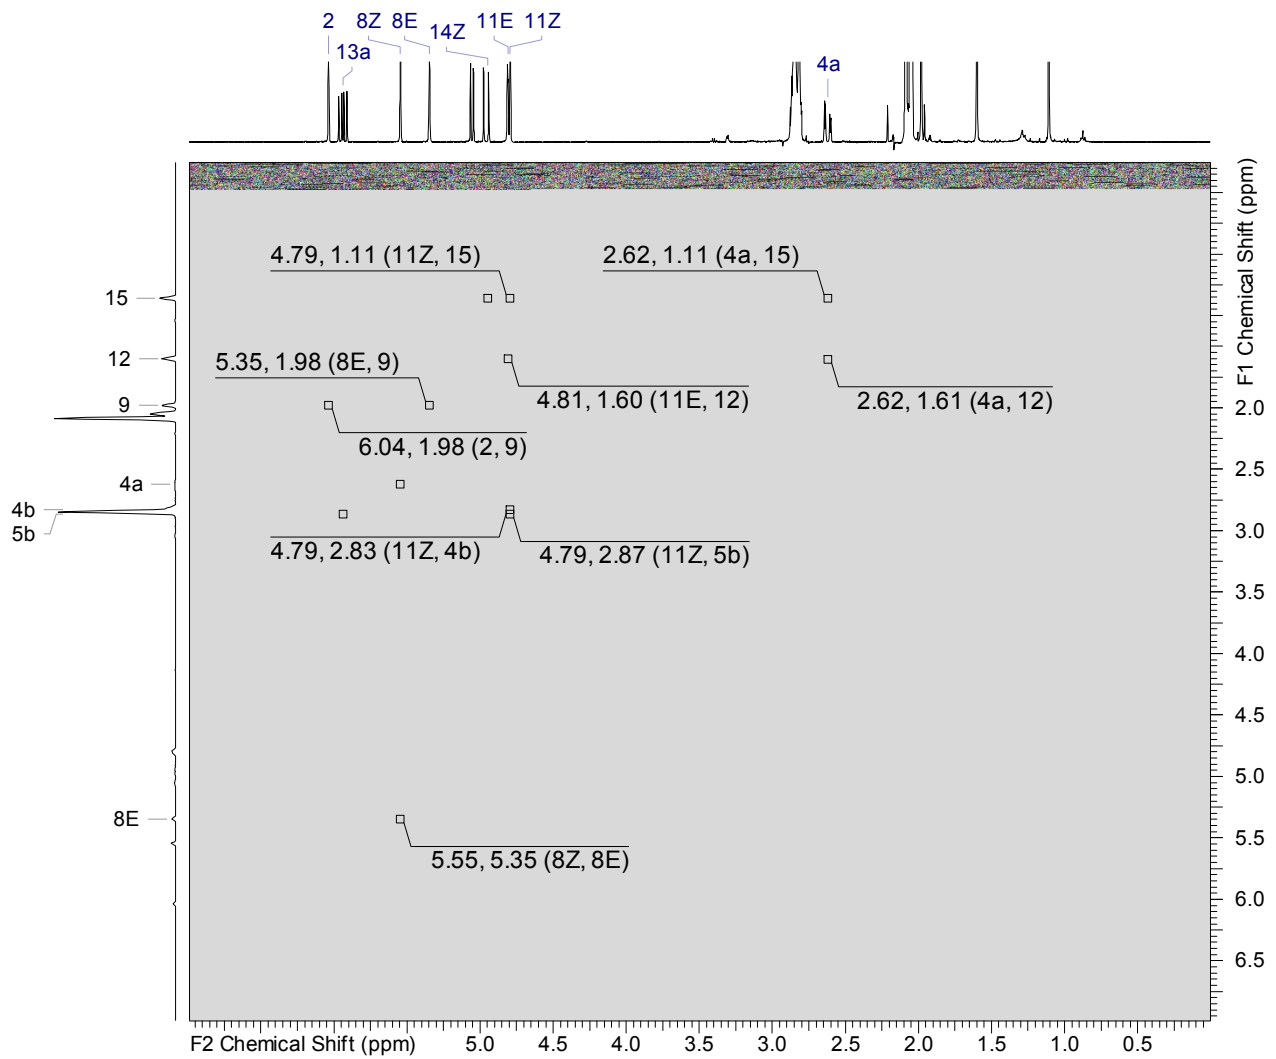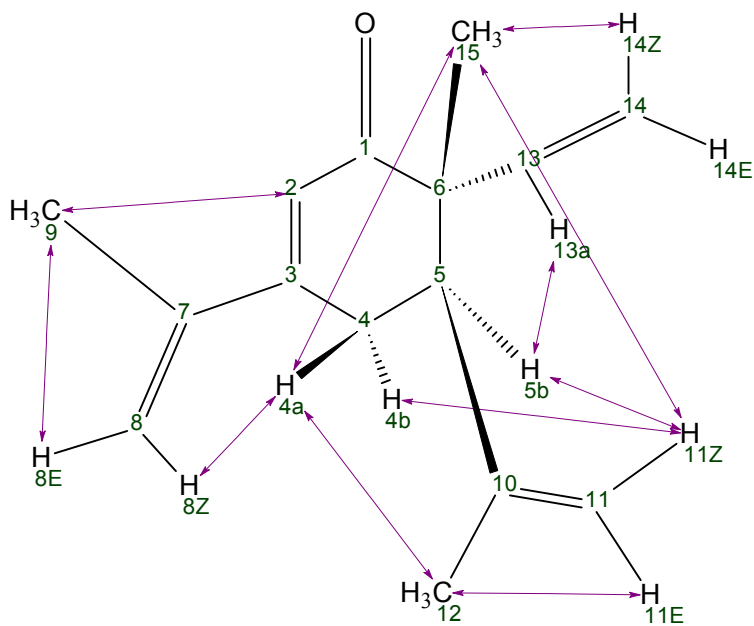

Supplement: c8fd00234g1.pdf [file c8fd00234g1.pdf]
